# Supplementary material for: Preparation of PMMA Electrospun Fibers Bearing Porphyrin Pendants and Photocatalytic Degradation of Organic Dyes
Source: MDPI journal article supplement (doi:10.3390/molecules27238132), 2022-11-22
Supplement: s1 [file s1]

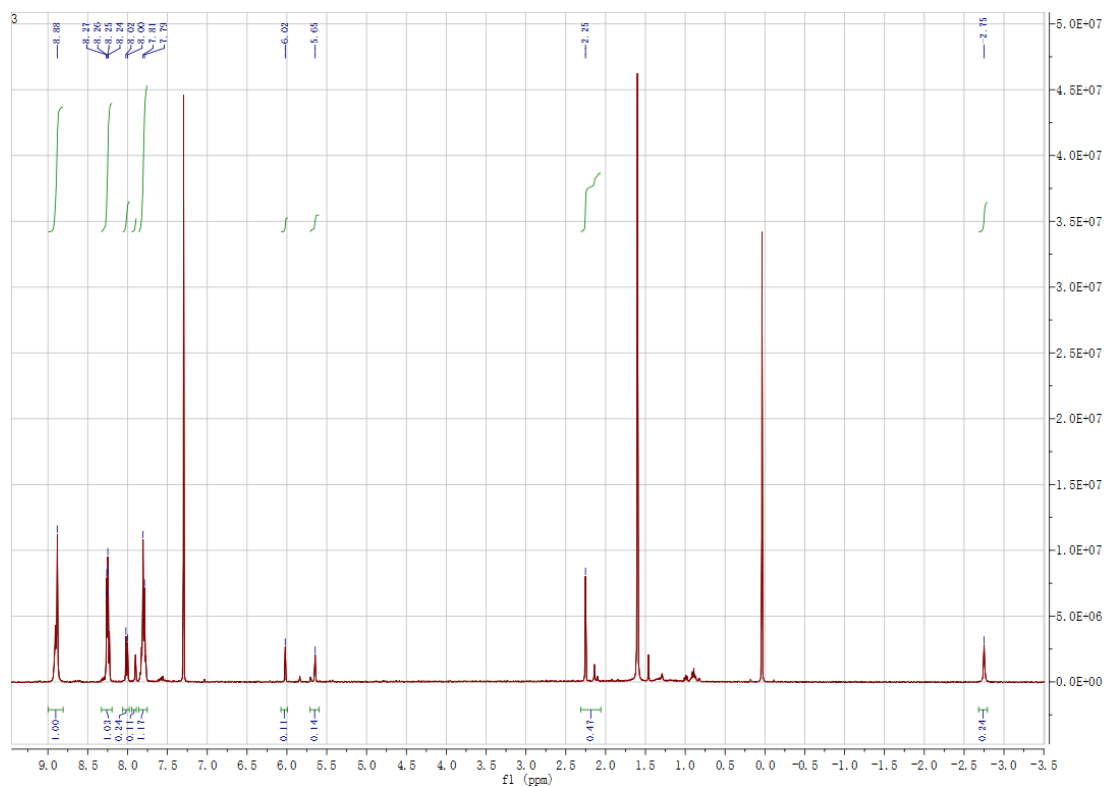

Figure S1.  $^1\text{H}$ -NMR Spectra for CPTPP.

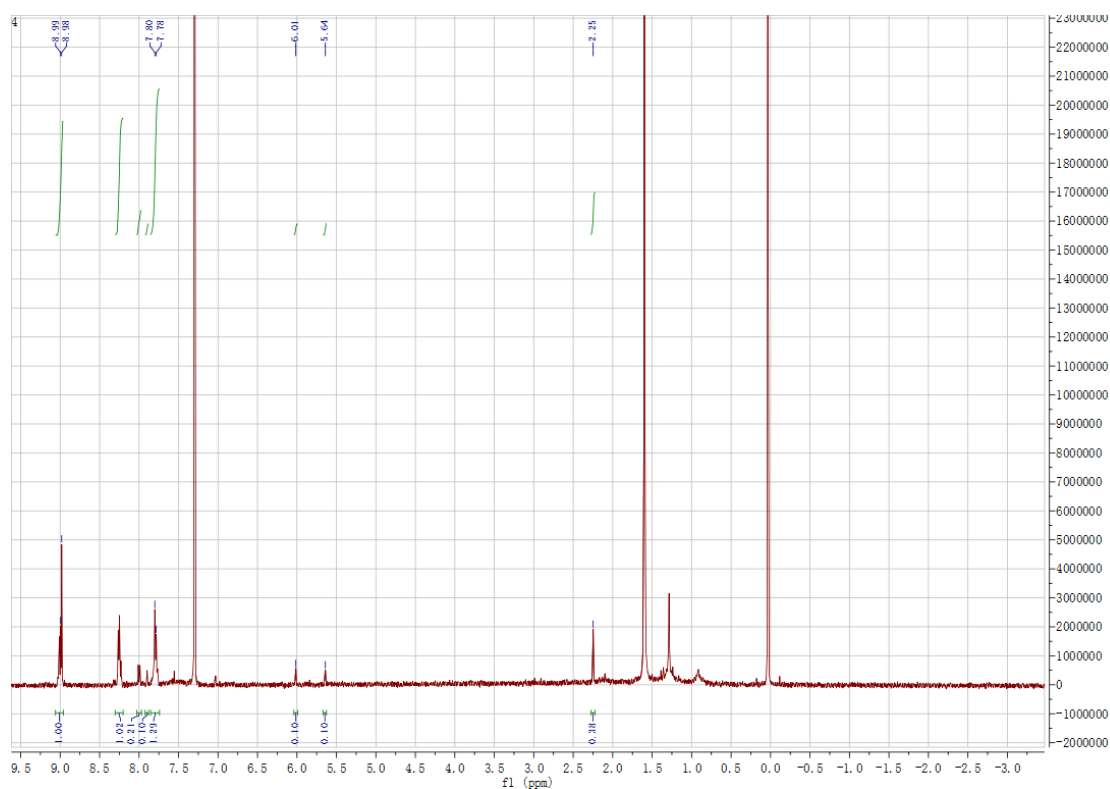

Figure S2.  $^1\text{H}$ -NMR Spectra for CPTPPZn.

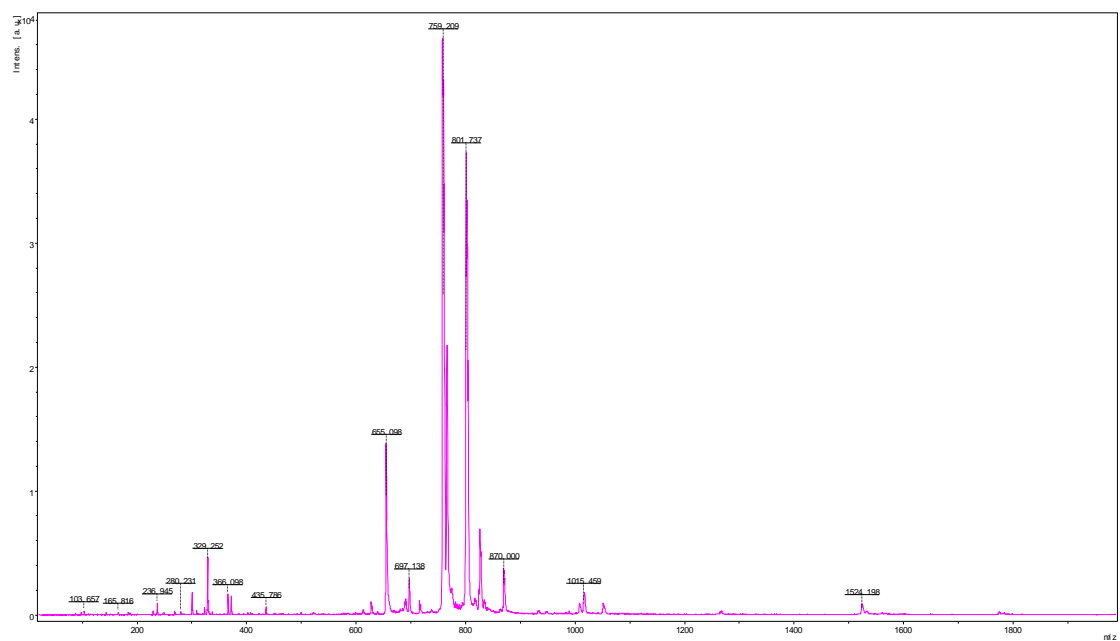

**Figure S3.** MS Spectra for CPTPPCu.
